# Supplementary material
Source: Copernicus journal article supplement (doi:10.5194/egusphere-2026-2218)
Supplement: Supplementary file 1 [file egusphere-2026-2218-supplement.pdf]

## Supplementary Material

# Hydrological and hydrochemical drought responses across ten solutes in a pre-alpine headwater catchment

5 Carolin Winter<sup>1</sup>, Julia L. A. Knapp<sup>2,3</sup>, James W. Kirchner<sup>4,5,6</sup>

<sup>1</sup>Chair of Environmental Hydrological Systems, University of Freiburg, Germany

<sup>2</sup>Department of Earth Sciences, Durham University, Durham, UK.

<sup>3</sup>now at the Chair of Hydrology, Department of Earth Sciences, University of Bayreuth, Bayreuth, Germany.

<sup>4</sup>Department of Environmental Systems Science, ETH Zurich, 8092 Zurich, Switzerland

10 <sup>5</sup>Swiss Federal Institute for Forest, Snow and Landscape Research WSL, 8903 Birmensdorf, Switzerland

<sup>6</sup>Department of Earth and Planetary Science, University of California, Berkeley, CA 94720, USA

*Correspondence to:* Carolin Winter (carolin.winter@hydrology.uni-freiburg.de)

## Content

15 Table S2

Figure S1-S2

**Summary.** This supplementary material complements the manuscript of Winter et al. (2026). It includes a table (Table S2)  
20 average solute concentrations in discharge, precipitation, soil water and groundwater of the Erlenbach catchment, a Figure  
(S1) depicting the hydro-meteorological conditions in the catchment, and another Figure (S2) depicting solute concentrations  
in the discharge and their differences between drought, normal and recovery conditions.

30 **Table S2. Median values and their interquartile ranges (grey) for solute concentrations in the stream discharge and precipitation during the summer drought in 2018, the subsequent recovery and during normal summer conditions (July-August, 2017, 2019 and 2020). Groundwater samples from Knapp et al. (2020) and Kiewiet et al. (2019) were taken from two pumping wells located upstream in the catchment at one to three sampling times, providing an estimate of potential groundwater concentrations that are, however, not necessarily representative of the entire catchment. Similarly, soil water samples (N= 41-102) from Knapp et al (2020) and Kiewiet et al. (2019) were taken at the adjacent**

35 **Studibach catchment, giving a good estimate but not being entirely representative for the Erlenbach catchment.**

| Solute<br>[µg L <sup>-1</sup> ] | Discharge      |       | Precipitation |       | Discharge |       | Precipitation |        | Discharge             |               | Precipitation   |               | Groundwater     | Soil water    |                 |                |
|---------------------------------|----------------|-------|---------------|-------|-----------|-------|---------------|--------|-----------------------|---------------|-----------------|---------------|-----------------|---------------|-----------------|----------------|
|                                 | Drought period |       |               |       | Recovery  |       |               |        | Normal summer periods |               |                 |               | From literature |               |                 |                |
| <b>Ca</b>                       | 58 022         | 2 685 | 44 455        | 1 980 | 53 506    | 1 850 | 50 057        | 13 553 | [56 458-60 123]       | [2 456-3 444] | [38 412-49 545] | [1 822-2 168] | [47 575-57 309] | [1 329-2 791] | [46 648-53 880] | [3 461-31 007] |
| <b>Mg</b>                       | 3 929          | 147   | 2 904         | 104   | 3 525     | 88    | 1 767         | 13 588 | [3 766-4 098]         | [131-194]     | [2 405-3 353]   | [97-119]      | [3 025-3 850]   | [68-138]      | [1 503-2 013]   | [3 885-20 429] |
| <b>SO<sub>4</sub></b>           | 26 866         | 419   | 18 981        | 211   | 10 998    | 198   | 4 944         | 892    | [23 708-31 409]       | [176-672]     | [16 058-25 483] | [128-425]     | [8 123-13 373]  | [80-600]      | [3 557-6 531]   | [428-1865]     |
| <b>NO<sub>3</sub></b>           | 1 561          | 559   | 699           | 323   | 688       | 465   | 1 672         | 84     | [1 468-1 717]         | [367-1 471]   | [328-841]       | [221-760]     | [469-899]       | [197-1 019]   | [514-1 840]     | [9.5-565]      |
| <b>Cl</b>                       | 496            | 48    | 283           | 39    | 259       | 42    | 891           | 739    | [476-566]             | [25-121]      | [190-419]       | [18-224]      | [186-322]       | [16-96]       | [768-961]       | [447-1319]     |
| <b>K</b>                        | 977            | 113   | 789           | 30    | 830       | 110   | 1 197         | 527    | [951-1 016]           | [60-254]      | [665-912]       | [23-48]       | [695-937]       | [51-219]      | [1 101-1 210]   | [273-879]      |
| <b>Cr</b>                       | 0.04           | 0.02  | 0.07          | 0.01  | 0.05      | 0.02  | 0.13          | 0.47   | [0.03-0.06]           | [0.00-0.55]   | [0.03-0.13]     | [0.00-0.11]   | [0.03-0.17]     | [0.00-0.10]   | [0.13-0.14]     | [0.02-1.04]    |
| <b>Fe</b>                       | 1.45           | 1.48  | 4.16          | 1.04  | 3.95      | 1.65  | 1.21          | 18     | [0.87-3.55]           | [0.00-8.92]   | [1.13-29.0]     | [0.23-2.39]   | [1.28-63]       | [0.00-14]     | [0.61-2.07]     | [6.6-109]      |
| <b>Sr</b>                       | 404            | 8.8   | 293           | 5.71  | 331       | 5.97  | 556           | 99     | [375-423]             | [7.23-12.50]  | [240-338]       | [5.37-6.94]   | [270-366]       | [3.58-13]     | [551-560]       | [0.77-297]     |
| <b>Mn</b>                       | 0.1            | 0.19  | 0.22          | 0.06  | 0.25      | 0.26  | 0.42          | 12     | [0.05-1.90]           | [0.03-3.99]   | [0.03-4.36]     | [0.00-0.79]   | [0.07-7.06]     | [0.04-5.79]   | [0.25-1.8]      | [4.0-64]       |

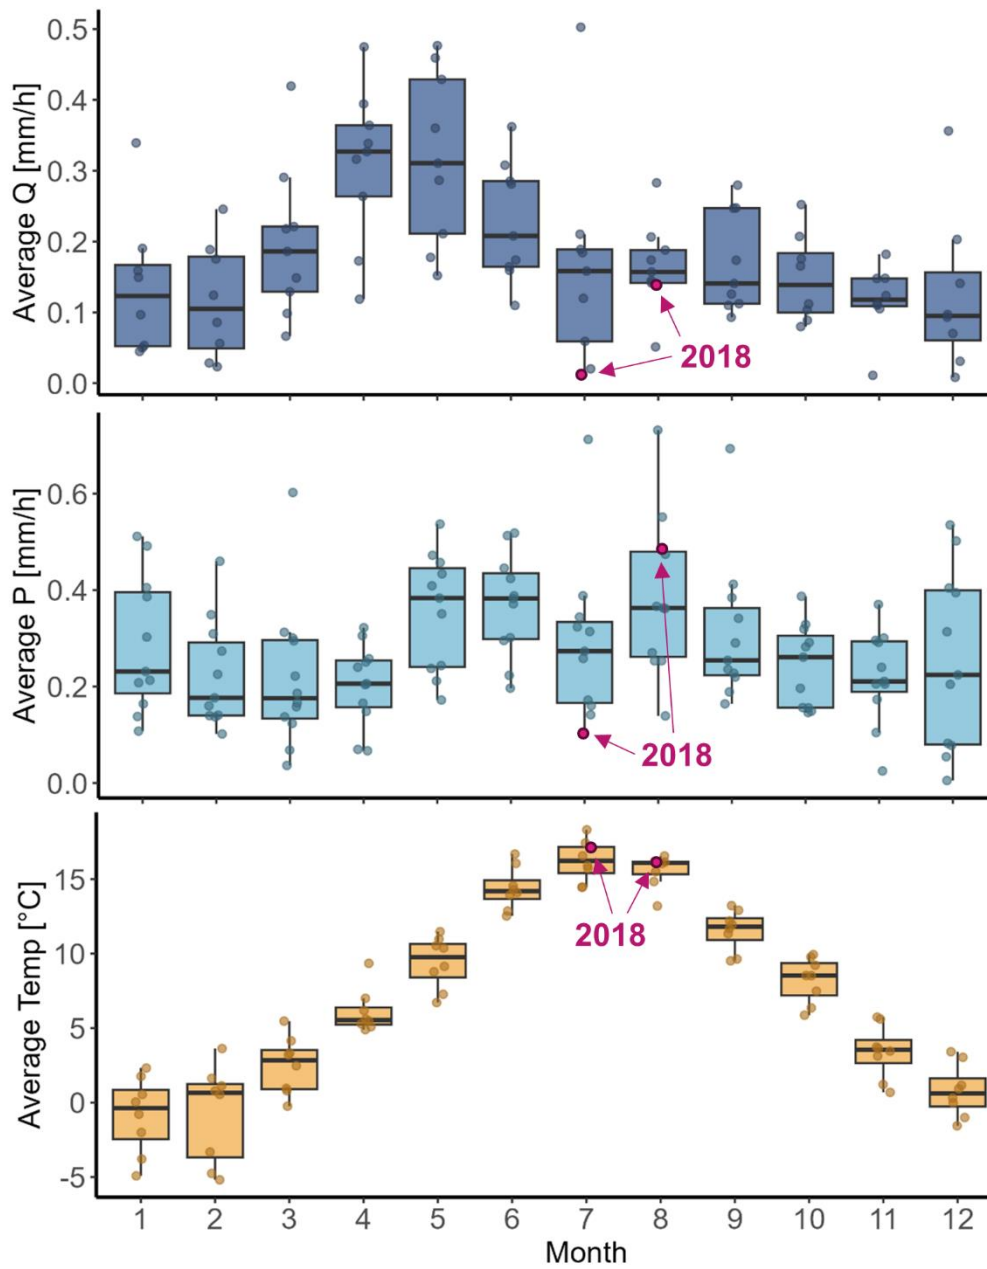

Figure S1. Average Hydro-meteorological conditions in the Erlenbach catchment (2012-2020).

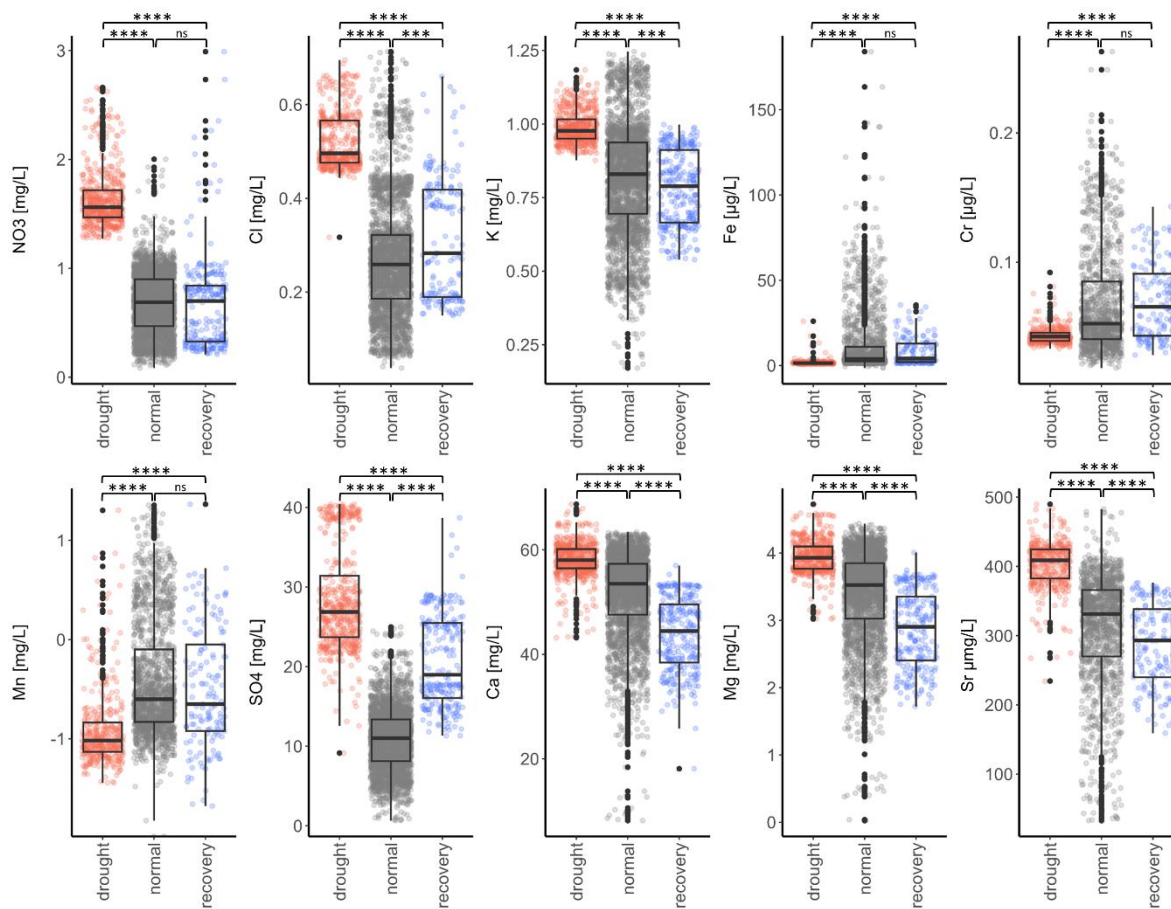

40

**Figure S2. Solute concentrations compared between drought, recovery and normal conditions: Significant differences were tested using the Kruskal-Wallis test with Bonferroni Post-Hoc correction and a significance level of 0.05.**
